# Supplementary material for: Retrospective study of BRAFV600E mutation and CT features of papillary thyroid carcinoma
Source: PeerJ. 2024 Jan 24;12:e16810. doi: 10.7717/peerj.16810 (PMC10821721; doi:10.7717/peerj.16810)
Supplement: Supplemental Information 1 [file peerj-12-16810-s001.xlsx]

## Sheet: Sheet2
BRAF status	Gender	Age		the longest diameter of the nodule		shape	calcification	area of marginal contact	margin	difference between the density of arterial and plain scan	difference between the density of arterial and plain scan	Lymph node metastasis
0	0	61	1	7	0	0	1	1/4<d<1/2	1	9	28	0
0	0	66	1	8.5	0	0	0	0	1	59.3	59.1	1
0	0	63	1	6.4	0	0	1	≥1/2	1	99.2	62	1
0	0	27	0	11	1	1	0	0	1	91.3	69.1	1
0	0	43	0	7.3	0	1	0	1/4<d<1/2	0	36.5	41	0
0	0	24	0	6.2	0	1	0	≤1/4	1	71.1	67	1
0	0	43	0	9.3	0	1	1	≤1/4	1	64.5	73.2	1
0	0	44	0	6.2	0	1	0	1/4<d<1/2	0	67.3	56.2	0
0	0	52	1	12.2	1	1	1	≤1/4	1	78.8	32.4	1
0	0	57	1	11	1	1	0	≥1/2	0	15.5	19.6	0
0	0	35	0	8.5	0	1	1	1/4<d<1/2	0	35.8	25.1	1
0	0	51	1	13.4	1	1	0	≤1/4	1	14.1	29.7	1
0	0	52	1	13.4	1	1	0	1/4<d<1/2	1	30	34.7	1
0	0	37	0	9.8	0	0	1	1/4<d<1/2	1	59.4	66.3	0
0	1	48	1	8	0	1	1	0	0	51.4	42.3	0
0	0	23	0	6	0	0	0	0	0	55.9	42.1	0
0	0	35	0	5	0	1	0	≤1/4	0	77	61	0
0	0	25	0	40	1	1	0	1/4<d<1/2	0	74.5	52.9	1
0	0	31	0	6	0	0	0	1/4<d<1/2	0	78	40	0
0	0	30	0	6.2	0	0	1	≤1/4	1	54.6	46.3	1
0	0	42	0	12.3	1	1	1	≥1/2	0	54.8	35.8	1
0	0	34	0	10	0	1	1	1/4<d<1/2	1	63.7	39.7	1
0	1	45	0	9.3	0	0	0	≤1/4	1	77.7	59.3	1
0	0	54	1	16	1	1	1	≥1/2	1	26.4	18.4	1
0	0	49	1	5.2	0	0	1	0	1	52.5	28	0
0	0	22	0	13.5	1	0	1	≤1/4	0	79.1	117	1
0	0	37	0	10	0	0	1	≤1/4	0	78.4	39.3	1
0	1	33	0	11	1	0	0	1/4<d<1/2	0	85.5	56.5	1
0	0	29	0	15.6	1	1	0	≤1/4	0	25.4	25.5	1
0	0	33	0	5	0	1	0	0	1	69.6	60.4	1
0	1	39	0	8.1	0	1	0	1/4<d<1/2	1	55.9	28.8	1
0	1	40	0	11	1	0	0	1/4<d<1/2	1	59.3	56.5	1
0	1	31	0	13.2	1	0	0	1/4<d<1/2	1	72.9	48.4	0
0	0	58	1	13.4	1	0	1	≥1/2	0	92.3	63	0
0	1	52	1	7	0	0	0	0	0	55.7	34	1
0	0	49	1	8.1	0	0	1	0	0	104.9	66.8	0
0	0	56	1	5.7	0	0	0	≥1/2	0	76.7	62.4	0
0	0	44	0	5.1	0	0	0	0	0	86.5	88	0
0	1	36	0	7.8	0	1	0	0	1	29	63.8	1
0	1	44	0	7.7	0	1	1	1/4<d<1/2	1	16.1	13.7	1
0	0	56	1	33	1	0	1	≥1/2	0	80.2	55.9	1
0	0	50	1	6.5	0	1	0	≤1/4	0	77.5	85.2	0
0	0	61	1	8	0	0	1	0	1	59.5	32.6	0
0	0	57	1	22	1	0	0	≥1/2	0	22.5	52.8	1
0	1	36	0	7.2	0	0	0	0	1	46.5	40.3	1
0	0	32	0	6.3	0	0	0	1/4<d<1/2	0	31.1	40.8	1
0	0	43	0	9	0	0	1	0	1	53.2	54.3	1
0	1	43	0	15	1	0	1	≤1/4	1	52.8	51.9	1
0	0	57	1	15	1	1	0	≤1/4	0	19	33.5	1
0	1	22	0	34	1	1	1	≥1/2	0	55.7	22	1
0	1	36	0	36	1	0	1	≤1/4	0	82.4	37.2	0
0	0	43	0	17	1	0	1	≤1/4	0	72	71.5	1
0	0	52	1	7	0	0	1	≥1/2	0	101.8	90.8	1
0	1	43	0	8.4	0	1	1	0	0	41.8	36	0
0	0	37	0	8.3	0	1	0	1/4<d<1/2	1	34.4	75.3	0
0	1	26	0	7.8	0	0	0	≤1/4	0	-6.9	-1.6	1
0	0	36	0	9	0	0	0	≤1/4	1	32.2	39.2	0
0	0	48	1	7	0	1	0	≤1/4	1	34.2	61.8	0
0	0	51	1	20	1	1	1	1/4<d<1/2	1	54.7	58.8	0
0	0	34	0	11	1	1	0	1/4<d<1/2	1	26	31.2	1
0	0	28	0	6.3	0	0	0	≥1/2	0	77.5	30.2	1
0	0	31	0	17	1	0	1	≥1/2	0	61.7	37.1	1
0	0	40	0	7.8	0	1	0	1/4<d<1/2	1	62.7	48	1
0	1	29	0	5.7	0	0	0	≤1/4	0	75	50.2	0
0	0	28	0	10.3	1	1	0	≤1/4	1	64.3	55.6	0
0	1	51	1	9.1	0	0	1	0	1	63.1	56.2	1
0	1	47	1	10	0	0	0	≥1/2	0	101.5	74.8	1
0	1	58	1	10	0	0	1	≥1/2	0	31.1	19.5	1
0	0	53	1	7.2	0	1	0	≤1/4	1	14	18.1	1
0	0	30	0	6	0	0	0	≤1/4	0	63.5	50.3	1
0	1	45	0	10	0	0	0	1/4<d<1/2	1	87.7	52.1	0
0	1	55	1	10	0	0	1	≥1/2	1	7.3	13	0
0	1	28	0	5.5	0	1	0	≤1/4	1	9.8	13.6	1
0	0	29	0	10	0	0	1	1/4<d<1/2	0	31.1	40.5	0
0	0	31	0	15	1	0	1	≤1/4	1	82.8	48.3	1
0	1	37	0	12	1	1	0	≥1/2	1	15.2	18.6	1
0	0	29	0	10.2	1	0	1	1/4<d<1/2	1	142.6	91.8	1
0	0	36	0	9.7	0	0	0	1/4<d<1/2	0	147.3	97.7	1
0	0	55	1	22	1	0	1	0	0	28.5	9.8	0
0	0	63	1	6	0	0	1	≤1/4	1	76.4	73.9	0
0	0	50	1	8.4	0	0	1	≤1/4	1	51.9	28.8	1
0	1	34	0	16.2	1	0	1	≥1/2	0	62.5	46.5	1
0	0	49	1	5.8	0	0	0	1/4<d<1/2	0	38	48.9	0
0	1	39	0	12.1	1	1	1	≤1/4	0	49	43.9	0
0	0	40	0	12.4	1	1	0	≥1/2	1	21.5	21.7	1
0	0	55	1	30	1	0	1	0	1	75.3	50.4	1
0	0	50	1	5.1	0	0	0	1/4<d<1/2	1	49.5	56	0
0	0	62	1	10	0	1	0	1/4<d<1/2	1	89.7	85.9	1
0	1	32	0	6.3	0	0	0	≤1/4	0	56.5	42.1	0
0	0	35	0	6.5	0	0	0	≥1/2	1	112.9	61.2	1
0	0	49	1	10.7	1	1	0	1/4<d<1/2	1	112.5	60.3	0
0	1	22	0	10.2	1	1	0	≤1/4	1	36.5	21.8	0
0	0	58	1	6.4	0	0	0	1/4<d<1/2	1	51.7	31.3	1
0	0	43	0	6.9	0	1	1	1/4<d<1/2	0	70	54.2	0
0	0	42	0	5.5	0	0	0	≤1/4	1	71.7	90.7	0
0	0	39	0	12	1	0	0	≥1/2	0	67.2	59.7	0
0	0	45	0	12	1	0	0	≥1/2	0	45.8	29.8	0
0	0	58	1	24	1	0	1	≥1/2	0	11.9	21.9	1
0	0	30	0	13.6	1	1	1	≤1/4	1	121	98.8	1
0	0	37	0	10.4	1	0	1	≤1/4	0	6.5	10.6	1
0	1	25	0	5	0	1	0	0	1	63.5	45.7	1
0	0	51	1	10.6	1	0	1	1/4<d<1/2	0	94.1	60.9	0
0	0	28	0	25.2	1	1	0	1/4<d<1/2	1	49.2	35.8	1
0	0	43	0	5.4	0	0	0	≤1/4	0	18.3	11.3	0
0	0	42	0	12.1	1	1	0	1/4<d<1/2	0	73.8	36.6	1
0	0	60	1	5.7	0	0	1	0	0	44.1	46	0
0	0	29	0	9	0	1	0	≤1/4	1	47.1	45.8	1
0	1	44	0	7.5	0	1	1	≥1/2	1	83.2	71.1	1
0	0	28	0	11.4	1	0	0	1/4<d<1/2	0	73.1	57.7	1
0	0	37	0	11	1	0	1	1/4<d<1/2	0	59.9	57.7	0
0	0	59	1	11.3	1	0	1	≥1/2	0	74	47.9	0
0	0	27	0	7.2	0	1	0	0	1	105.4	73.7	0
0	0	57	1	10.6	1	0	1	≤1/4	1	60.3	54.8	0
0	0	54	1	6.9	0	0	0	≤1/4	0	40.6	40.7	1
0	0	47	1	24.3	1	0	1	0	0	78.4	49.9	0
0	0	46	1	10.9	1	0	0	0	0	43.6	28.7	1
0	0	38	0	18	1	0	1	≥1/2	0	68.1	54.2	1
0	0	32	0	7.7	0	0	1	≤1/4	1	97	73.1	1
0	0	31	0	12	1	1	1	1/4<d<1/2	1	52.5	55	1
0	1	37	0	7.6	0	1	0	1/4<d<1/2	1	54.7	64.2	0
0	0	16	0	17.8	1	1	0	0	0	87.4	78.5	1
0	0	49	1	16.4	1	1	0	≥1/2	1	58.1	56.4	1
0	0	57	1	11.4	1	1	1	≤1/4	1	62.1	72	0
0	0	36	0	7.8	0	0	0	≤1/4	0	31.1	68.8	1
0	1	61	1	46.3	1	1	1	≥1/2	1	16.2	20.2	1
0	1	37	0	9.6	0	1	0	≥1/2	0	99	64.8	1
0	0	31	0	11.1	1	0	1	1/4<d<1/2	0	8.7	21.8	1
0	0	27	0	9.7	0	1	1	0	1	55.5	48.2	1
0	0	61	1	6.3	0	1	0	≤1/4	1	38.3	42.2	0
0	0	62	1	14.2	1	0	0	≥1/2	0	50.5	63.4	0
0	1	28	0	54.3	1	1	1	0	0	29.5	63.3	1
0	0	35	0	5	0	0	0	0	1	15.3	21.3	1
0	0	43	0	7.7	0	0	0	1/4<d<1/2	0	31.6	43.9	0
0	0	30	0	5.5	0	0	1	≤1/4	0	69.4	65.9	0
0	0	39	0	12.8	1	0	1	≤1/4	0	15.9	18.2	1
0	1	58	1	9	0	0	0	1/4<d<1/2	0	39	28.3	1
0	1	30	0	21.7	1	0	0	≥1/2	0	86.2	54.5	1
0	0	28	0	12.9	1	0	0	≤1/4	0	23.9	22.7	1
0	0	45	0	9.7	0	0	1	1/4<d<1/2	0	19.1	25.5	1
0	1	35	0	9.2	0	1	0	1/4<d<1/2	1	37	35.1	1
0	0	52	1	11.3	1	0	1	≥1/2	1	81.3	53.8	0
0	0	36	0	8.3	0	0	0	≥1/2	0	20.6	60.2	1
0	0	45	0	5.7	0	0	0	≤1/4	0	61.4	87.9	1
0	0	51	1	5.5	0	0	0	0	0	44.2	69.6	0
0	0	47	1	7.9	0	0	0	1/4<d<1/2	0	61.5	67	1
0	0	31	0	9.6	0	0	0	1/4<d<1/2	0	26.4	19.1	1
0	0	36	0	9.5	0	0	0	≥1/2	0	53.8	49.6	1
0	0	51	1	13.3	1	1	0	≥1/2	1	23.8	13.9	1
0	0	38	0	25.3	1	1	1	≥1/2	0	55.4	40.4	1
0	1	55	1	9.7	0	1	1	1/4<d<1/2	1	14	29.7	0
0	0	39	0	9.2	0	0	0	≤1/4	0	35.7	25.5	1
0	0	49	1	10.8	1	1	1	≥1/2	1	44.3	42.5	0
0	0	38	0	7.4	0	1	0	≤1/4	1	48	56.4	0
0	0	54	1	7.4	0	0	0	1/4<d<1/2	0	51.4	70.7	1
0	0	71	1	10.1	1	0	0	1/4<d<1/2	1	69.3	64	0
0	0	61	1	14.8	1	1	1	1/4<d<1/2	1	128.9	86.5	0
0	0	44	0	7.7	0	0	0	≥1/2	0	36	34.9	1
0	0	56	1	6	0	0	0	1/4<d<1/2	0	53.2	61	1
0	0	25	0	10.5	1	0	0	1/4<d<1/2	1	66.4	87.5	1
0	0	49	1	8.7	0	0	0	≤1/4	0	86	71	1
0	0	28	0	7.6	0	0	0	≤1/4	0	28.7	45.8	1
0	0	36	0	12.3	1	0	0	1/4<d<1/2	0	37.5	31	0
0	0	60	1	8	0	0	0	1/4<d<1/2	0	20	65.5	0
0	0	43	0	6.1	0	1	0	0	1	42.6	48.6	1
0	0	53	1	11.9	1	1	1	≥1/2	1	77.1	59.4	0
0	1	45	0	24.6	1	0	0	≤1/4	0	56.2	40.9	1
0	0	48	1	13.6	1	1	1	1/4<d<1/2	0	148.9	59.1	0
0	0	25	0	5	0	0	0	0	1	81.6	102.4	1
0	0	36	0	13.9	1	0	1	≤1/4	0	23.6	39.9	1
0	0	30	0	7.9	0	1	0	≤1/4	0	62.8	92.1	1
0	1	31	0	8.5	0	0	0	≥1/2	0	19.1	23.6	0
0	0	35	0	5	0	1	1	≤1/4	1	16.3	51.3	1
0	1	46	1	22	1	1	0	≥1/2	1	69.8	45	1
0	0	61	1	7.4	0	0	0	≥1/2	1	51.6	32.7	0
0	0	31	0	12.7	1	0	1	1/4<d<1/2	0	43.7	41.4	1
0	0	62	1	10.3	1	1	0	≥1/2	1	46.7	31.4	1
0	1	31	0	8.3	0	0	0	1/4<d<1/2	0	49.1	38.4	0
0	0	35	0	22	1	0	1	0	0	46.3	80.5	1
0	0	48	1	10	0	1	0	≥1/2	0	52.5	39.6	0
0	0	30	0	5	0	1	0	≤1/4	1	37.2	48.4	1
0	0	31	0	36	1	0	1	0	0	85.2	61.1	1
0	0	39	0	8.8	0	0	0	1/4<d<1/2	0	25.2	30.3	0
0	0	16	0	14.5	1	1	1	≤1/4	1	12.7	28.5	1
0	1	41	0	8	0	0	1	0	1	27.8	30.7	1
0	0	37	0	5	0	0	1	0	0	23.3	23	1
0	0	46	1	12.6	1	0	0	0	0	94.6	86.4	0
0	0	36	0	6.9	0	1	0	1/4<d<1/2	1	90.2	48	1
0	0	51	1	7.7	0	1	0	1/4<d<1/2	1	51.6	66.8	0
0	0	34	0	6.7	0	1	0	1/4<d<1/2	0	49.6	45.8	0
0	1	38	0	17	1	0	1	1/4<d<1/2	0	18	24.5	1
0	0	38	0	10.6	1	0	1	≤1/4	0	50.2	74.5	0
0	0	23	0	15.8	1	0	0	≥1/2	0	27.2	15.9	0
0	0	32	0	8.9	0	1	0	≤1/4	0	89.5	95.6	1
0	0	42	0	10.3	1	1	0	≤1/4	1	18.5	14.7	0
0	1	23	0	6	0	0	1	0	1	23.7	31.5	0
0	0	62	1	20.4	1	0	1	≥1/2	1	15.3	24.9	1
0	0	39	0	17.6	1	0	1	≥1/2	1	40	43.1	1
0	0	46	1	6.5	0	1	0	1/4<d<1/2	1	45	51.6	0
0	1	46	1	11	1	1	1	1/4<d<1/2	1	57.6	48.6	1
0	1	55	1	14	1	0	1	≤1/4	1	46.2	39.5	1
0	1	44	0	5.5	0	1	0	1/4<d<1/2	0	79.2	30.8	1
0	1	49	1	20	1	0	1	≥1/2	1	80.2	33.2	1
0	0	46	1	6.2	0	1	0	1/4<d<1/2	1	56.8	44	0
0	0	42	0	7.4	0	0	1	≤1/4	0	41.3	102.8	1
0	0	53	1	9.6	0	0	1	≤1/4	0	101.2	71.9	0
0	1	66	1	15.6	1	1	1	1/4<d<1/2	1	17.2	25	1
0	0	51	1	6.5	0	1	0	≤1/4	1	61.1	57.6	0
0	0	30	0	11.1	1	0	1	≤1/4	1	80.9	54.1	0
0	0	32	0	7.2	0	1	0	0	0	46.3	45.5	1
0	1	48	1	6.3	0	0	0	1/4<d<1/2	0	44	32.8	1
0	1	32	0	11.7	1	1	0	≤1/4	0	4.3	11.6	0
0	0	39	0	5.6	0	0	0	0	0	79.2	69.6	0
0	0	38	0	6.5	0	0	0	≤1/4	0	31.2	27.7	1
0	0	34	0	21.6	1	0	1	≥1/2	0	52.3	39.9	1
0	1	64	1	7	0	0	1	≤1/4	1	56.6	72.3	1
0	0	44	0	18.2	1	1	1	≤1/4	0	44.3	62.8	1
0	1	25	0	7.2	0	1	0	0	1	36.6	74.6	1
0	1	27	0	7	0	1	1	0	1	68	62.1	1
0	1	46	1	15.7	1	0	1	≥1/2	0	20.2	45.8	1
0	0	39	0	7.1	0	1	0	≤1/4	1	34.4	59.3	0
0	0	43	0	6	0	1	0	≤1/4	1	66.2	74.3	0
0	0	59	1	7.4	0	1	1	≤1/4	1	51.5	47.8	0
0	0	22	0	27.5	1	0	1	1/4<d<1/2	0	27.2	36.1	1
0	0	20	0	6.7	0	1	0	≤1/4	1	13.5	45.4	1
0	0	61	1	6.3	0	1	0	1/4<d<1/2	1	45.8	37.8	0
0	0	42	0	7.3	0	1	0	≥1/2	0	56.1	34.2	0
0	0	34	0	10.7	1	1	0	0	1	62.6	43.2	1
0	0	31	0	12.1	1	1	0	1/4<d<1/2	1	35.5	27.4	1
0	0	56	1	7.5	0	1	0	0	1	15.8	31.2	0
0	0	29	0	28.7	1	1	0	≥1/2	0	57	87.9	1
0	0	46	1	8.4	0	0	1	1/4<d<1/2	1	42	60.1	1
0	1	39	0	15.4	1	1	1	1/4<d<1/2	1	36.7	24.3	1
0	0	34	0	5	0	0	0	1/4<d<1/2	0	47.1	40.8	1
0	1	32	0	35	1	1	1	≥1/2	1	53.2	23.4	1
0	0	34	0	6.9	0	0	0	≤1/4	0	86.4	122.6	0
0	0	38	0	14.7	1	0	1	≤1/4	1	59.6	82.2	0
0	0	51	1	5.7	0	1	0	1/4<d<1/2	1	60.3	39.7	0
0	0	55	1	8.1	0	1	0	≤1/4	1	78.1	93.4	0
0	0	51	1	9	0	0	0	1/4<d<1/2	0	108.3	80.2	0
0	1	63	1	8	0	0	0	≤1/4	0	73.3	55.4	0
0	1	59	1	6.2	0	0	0	0	0	57.6	64.9	0
0	1	48	1	9.4	0	1	0	1/4<d<1/2	1	58.1	51	1
0	0	38	0	7.9	0	0	0	0	0	132.5	102.5	1
0	0	38	0	20	1	1	1	1/4<d<1/2	0	31.9	53.8	1
0	1	31	0	6.1	0	1	0	1/4<d<1/2	1	113	51	1
0	0	27	0	19	1	1	1	0	1	105.6	128.5	0
0	0	31	0	6.1	0	0	0	≤1/4	0	15	23.5	1
0	0	30	0	11.8	1	0	0	≥1/2	1	21.5	32.6	1
0	0	35	0	14.8	1	1	1	1/4<d<1/2	1	83.4	79.9	1
0	0	58	1	22	1	0	1	≥1/2	0	49.1	44.5	0
0	0	39	0	10.1	1	1	1	≥1/2	0	15.5	27	0
0	0	26	0	14.3	1	1	1	1/4<d<1/2	0	78.3	65.9	1
0	0	38	0	9.6	0	1	0	≥1/2	1	63.1	69	1
0	1	33	0	11.2	1	0	0	≥1/2	0	80.6	47.2	1
0	1	30	0	18.9	1	1	1	≥1/2	1	49.7	53.6	0
0	1	38	0	19.7	1	1	0	≤1/4	1	73.3	56.1	1
0	0	54	1	10	0	0	1	0	1	22	37.3	0
0	0	65	1	13.9	1	1	1	1/4<d<1/2	1	42.5	80.1	0
0	0	65	1	19.3	1	1	1	≥1/2	1	32.5	36.9	0
0	0	41	0	8.1	0	1	0	≤1/4	1	77.3	45.6	1
0	0	24	0	10.4	1	1	1	0	1	76.7	42.9	1
0	1	64	1	13.5	1	1	1	≤1/4	1	30	60.2	1
0	0	40	0	12.9	1	1	0	1/4<d<1/2	1	58.1	53.4	1
0	0	66	1	6.2	0	0	0	≤1/4	0	93.8	55.4	0
0	0	55	1	6.2	0	0	0	0	0	43.4	33.3	0
0	0	37	0	8.1	0	1	0	≤1/4	0	39	38.7	1
0	1	22	0	22.8	1	0	0	≤1/4	0	12.6	13.5	1
0	0	52	1	12.7	1	1	0	≤1/4	0	88.1	72.7	0
0	1	50	1	17.9	1	0	1	≥1/2	1	26.8	36.8	1
0	0	28	0	14.5	1	0	0	1/4<d<1/2	0	42	65.7	1
0	1	39	0	5	0	1	1	0	1	40.2	49	0
0	0	40	0	7.3	0	0	0	1/4<d<1/2	0	72.1	50.7	1
0	0	36	0	10.8	1	0	0	≥1/2	0	10.2	19.7	1
0	1	44	0	10	0	1	1	1/4<d<1/2	1	35.9	34.1	1
0	0	20	0	17.5	1	0	1	0	1	49	82.2	1
0	1	28	0	21.4	1	1	1	1/4<d<1/2	1	11.6	19.5	1
0	1	59	1	10.9	1	0	0	≥1/2	0	15.7	11.4	1
0	0	51	1	10.7	1	1	1	0	1	51.5	38.4	1
0	0	46	1	16.2	1	1	1	≥1/2	0	10.9	23	1
0	0	32	0	15.9	1	0	0	≤1/4	0	98	93.8	0
0	1	30	0	11.9	1	1	1	≤1/4	0	52.2	48.2	1
0	0	43	0	5.6	0	0	0	0	1	109.9	69.8	0
0	1	32	0	16.1	1	0	0	≥1/2	1	10.3	14.4	1
0	1	44	0	10.6	1	0	1	1/4<d<1/2	0	31.4	34.5	0
0	0	45	0	7.2	0	1	0	≤1/4	1	50.8	66.4	1
0	1	21	0	6.7	0	1	0	0	1	54.9	58.5	0
0	0	33	0	9.2	0	0	0	1/4<d<1/2	0	51.1	46.9	1
0	0	54	1	6.6	0	1	1	≤1/4	0	49.9	41.3	1
0	0	47	1	5.5	0	0	0	1/4<d<1/2	0	15.5	35.1	1
0	1	40	0	7.4	0	0	0	0	1	61.9	51	0
0	0	59	1	11.7	1	0	1	1/4<d<1/2	0	91.4	80.8	1
0	0	53	1	22.6	1	1	0	≤1/4	1	44.5	41.7	0
0	0	63	1	17.8	1	0	0	≥1/2	0	28.7	19.8	0
0	1	60	1	12.1	1	0	0	≤1/4	1	80.7	30.8	1
0	0	47	1	12.8	1	1	0	0	1	52.9	34.8	1
0	0	29	0	14	1	1	0	0	1	114.4	93.5	0
0	0	33	0	30	1	0	0	0	0	76.9	65.9	1
0	0	36	0	8.2	0	1	0	1/4<d<1/2	1	23.3	34.8	1
0	0	45	0	14	1	1	0	≥1/2	0	44.7	56.1	1
0	0	64	1	22.1	1	1	1	≥1/2	0	68.2	41.9	1
0	0	64	1	11.5	1	1	1	1/4<d<1/2	0	51.6	53.9	1
0	1	45	0	11.9	1	1	0	1/4<d<1/2	0	13.4	23.8	0
0	0	35	0	8.4	0	1	0	≤1/4	1	52	27	1
0	0	38	0	7.5	0	0	0	0	0	62.6	40.4	1
0	1	27	0	13.5	1	1	1	0	1	98.3	50	1
0	0	64	1	10.7	1	1	0	≤1/4	1	18.2	11.2	1
0	0	61	1	11.7	1	0	0	≥1/2	1	53.2	64.2	0
0	0	49	1	14.9	1	1	0	≥1/2	0	66.5	44.9	1
0	0	55	1	7	0	0	0	≤1/4	0	33.8	46.2	1
0	1	48	1	14	1	1	0	1/4<d<1/2	1	1.6	14.2	1
0	1	65	1	12	1	0	1	1/4<d<1/2	1	44.2	54.2	0
0	1	31	0	5.7	0	1	0	≤1/4	1	34.3	47.3	0
0	0	32	0	7.3	0	0	1	0	1	80.6	61.1	0
0	0	33	0	5.5	0	1	0	≤1/4	0	77.1	53.2	0
1	1	39	0	5.9	0	1	0	0	1	41.4	61.5	1
1	1	47	1	11.6	1	1	1	≤1/4	1	97.9	65.8	1
1	1	45	0	22	1	1	1	0	1	50.8	48.7	1
1	1	53	1	8.8	0	1	0	0	1	71.4	47.9	0
1	0	37	0	5	0	0	0	0	0	65.6	65.1	0
1	0	23	0	5.6	0	1	0	1/4<d<1/2	0	35.8	78.3	1
1	0	28	0	28.1	1	1	0	≥1/2	1	38.9	57	1
1	0	42	0	15	1	1	0	1/4<d<1/2	0	74.9	68	1
1	0	45	0	7.8	0	1	0	≤1/4	0	97.9	83	1
1	0	32	0	20	1	1	1	≤1/4	0	66.8	48.3	1
1	1	32	0	21	1	1	1	≥1/2	1	102.1	63.6	1
1	1	44	0	12	1	1	0	1/4<d<1/2	1	90.2	47.6	1
1	0	29	0	15	1	0	1	≥1/2	1	79.9	55.6	1
1	0	15	0	23	1	0	1	≥1/2	1	72.3	90.3	1
1	1	26	0	5	0	0	0	1/4<d<1/2	0	32.7	47.6	0
1	0	39	0	5.2	0	1	0	1/4<d<1/2	1	19.1	37.9	0
1	1	46	1	7.4	0	1	0	0	1	44.4	43.5	1
1	0	31	0	11.1	1	1	1	1/4<d<1/2	1	38.5	43.3	1
1	0	22	0	12.3	1	1	1	0	1	32	38.1	1
1	1	53	1	6.8	0	0	1	0	1	89.5	57.1	1
1	0	36	0	7.9	0	1	1	1/4<d<1/2	0	59.4	49.8	0
1	0	45	0	10.7	1	0	1	0	1	106.6	92.2	1
1	0	30	0	9.8	0	0	0	≥1/2	1	95.6	56.1	1
1	1	30	0	6.3	0	0	1	≥1/2	1	111.5	70.1	1
1	1	39	0	19.1	1	1	1	≥1/2	1	77.5	41.1	1
1	1	28	0	16.4	1	1	1	≥1/2	0	46.7	30.7	1
1	0	44	0	8.7	0	0	1	1/4<d<1/2	1	67	68.3	0
1	1	54	1	28	1	1	1	≥1/2	1	51.4	14	1
1	0	24	0	31.7	1	1	1	≥1/2	1	116.2	120.6	1
1	0	39	0	6.5	0	0	0	≥1/2	0	42.5	41	1
1	0	57	1	5.9	0	0	0	0	0	39.5	55.1	1
1	0	35	0	5.2	0	1	0	≤1/4	0	73.5	75.6	0
1	0	52	1	21.3	1	0	0	≥1/2	1	22	33.7	0
1	0	38	0	8.9	0	1	0	≤1/4	1	67.7	54.6	0
1	1	55	1	5	0	0	1	≤1/4	1	63	39	1
1	0	50	1	14	1	0	0	≥1/2	0	84.1	75	0
1	0	40	0	5.2	0	0	0	≥1/2	0	49.2	39.7	0
1	1	33	0	18.7	1	0	1	≤1/4	1	131.8	77.1	1
1	0	36	0	19.2	1	0	1	1/4<d<1/2	0	101	67.7	1
1	1	61	1	8.8	0	1	1	1/4<d<1/2	1	31.5	21.8	0
1	0	28	0	11.6	1	1	0	1/4<d<1/2	0	49.8	51.3	1
1	0	52	1	14.4	1	1	0	1/4<d<1/2	1	57	44.7	1
1	0	50	1	13.4	1	1	0	≤1/4	1	39.9	53.8	1
1	0	46	1	18.6	1	1	0	0	1	62.4	61.8	1
1	0	43	0	7.3	0	1	1	0	1	0	2.2	0
1	0	65	1	14.4	1	1	0	≥1/2	1	55.4	74.2	0
1	0	61	1	9.6	0	1	1	1/4<d<1/2	1	78.7	78.1	0
1	0	34	0	26.3	1	0	1	1/4<d<1/2	0	52.7	78.5	1
1	0	55	1	8.2	0	0	0	≤1/4	0	36.1	53.9	0
1	0	35	0	6.8	0	0	0	≥1/2	1	39.1	37.9	0
1	0	43	0	5.9	0	0	0	0	1	57.8	63.9	0
1	1	48	1	10.8	1	1	0	0	1	26.4	45.4	1
1	0	42	0	19.2	1	1	1	≥1/2	1	31.5	30.8	0
1	0	32	0	7.6	0	0	0	≤1/4	0	59.6	87.5	0
1	0	53	1	35.4	1	1	1	≥1/2	1	86.9	30.6	1
1	1	23	0	23	1	1	1	1/4<d<1/2	1	73.4	49.4	1
1	1	46	1	11.3	1	1	1	1/4<d<1/2	1	86.7	47.5	1
1	0	30	0	33	1	1	1	≥1/2	1	71.6	85.3	1
1	0	45	0	11.2	1	1	0	≤1/4	1	81.5	52.1	0
1	0	57	1	17	1	0	1	0	1	72.3	39.8	0
1	0	26	0	10.6	1	0	1	≥1/2	0	100.7	65.5	1
1	0	42	0	13.4	1	1	1	1/4<d<1/2	0	87.5	56	0
1	0	36	0	8.1	0	0	0	≤1/4	1	67.6	49.6	1
1	0	40	0	9	0	1	1	0	1	30.5	53.1	0
1	0	25	0	6.5	0	1	0	≤1/4	1	83.7	51	1
1	0	34	0	10.7	1	1	1	0	1	40.3	34.7	1
1	0	43	0	12.1	1	1	1	≥1/2	1	77	48.4	0
